# Supplementary material
Source: PubMed Central journal article supplement (PMC3753565)
Supplement: supp_btt384_Sharman_Gerloff.MaGnET.revised_supplementary.pdf [file supp_btt384_Sharman_Gerloff.MaGnET.revised_supplementary.pdf]

## SUPPLEMENTARY INFORMATION

**Supplementary Table 1.** A current list of links to other online resources provided within MaGnET gene fact sheets.

| Resource (home page)                                                                                                                                                                                                         | Summary                                                                                                                                                                                                |
|------------------------------------------------------------------------------------------------------------------------------------------------------------------------------------------------------------------------------|--------------------------------------------------------------------------------------------------------------------------------------------------------------------------------------------------------|
| PlasmoDB<br>( <a href="http://plasmodb.org/plasmo/">http://plasmodb.org/plasmo/</a> )                                                                                                                                        | <i>Plasmodium</i> Genomics Resource. Provides access to publically available genomic, functional genomic and expression datasets and community annotation for all sequenced <i>Plasmodium</i> species. |
| GeneDB<br>( <a href="http://www.genedb.org/Homepage/Pfalciparum">http://www.genedb.org/Homepage/Pfalciparum</a> )                                                                                                            | Sequence and annotation information for all <i>Plasmodium</i> species sequenced at the Wellcome Trust Sanger Institute.                                                                                |
| UCSC Malarial Genome Browser<br>( <a href="http://exon.ucsc.edu/cgi-bin/hgGateway?db=pf5">http://exon.ucsc.edu/cgi-bin/hgGateway?db=pf5</a> )                                                                                | <i>P. falciparum</i> genome browser allowing upload and display of custom data as well as publically available datasets.                                                                               |
| ApiCyc<br>( <a href="http://apicyc.apidb.org/PLASMO/">http://apicyc.apidb.org/PLASMO/</a> )                                                                                                                                  | <i>P. falciparum</i> metabolic pathways, computationally generated.                                                                                                                                    |
| Malaria IDC Strain Comparison Database<br>( <a href="http://malaria.ucsf.edu/comparison/index.php">http://malaria.ucsf.edu/comparison/index.php</a> )                                                                        | Database of information from the microarray studies published by the DeRisi laboratory.                                                                                                                |
| TDR Targets Database<br>( <a href="http://tdrtargets.org/">http://tdrtargets.org/</a> )                                                                                                                                      | Chemogenomics resource for neglected tropical diseases, with information on potential targets and compounds.                                                                                           |
| Malaria Drug Target Discovery System<br>( <a href="http://malport.bi.up.ac.za:8150/">http://malport.bi.up.ac.za:8150/</a> )                                                                                                  | Database of functional genomics data and predictions for various <i>Plasmodium</i> species, as well as the host and vector species.                                                                    |
| Malaria Literature Database<br>( <a href="http://chemlims.com/MalariaGenePaper/MalariaGenePaperServlet.ChemInfo?module=Overview">http://chemlims.com/MalariaGenePaper/MalariaGenePaperServlet.ChemInfo?module=Overview</a> ) | Database of literature references and genes for <i>Plasmodium</i> species.                                                                                                                             |
| ModBase<br>( <a href="http://modbase.compbio.ucsf.edu/">http://modbase.compbio.ucsf.edu/</a> )                                                                                                                               | Database of comparative protein structure models, calculated by a modeling pipeline.                                                                                                                   |
| OrthoMCL<br>( <a href="http://orthomcl.org">http://orthomcl.org</a> )                                                                                                                                                        | Database of ortholog groups of sequences from multiple species.                                                                                                                                        |
| UniProtKB<br>( <a href="http://www.uniprot.org/">http://www.uniprot.org/</a> )                                                                                                                                               | Comprehensive protein knowledgebase containing protein sequences and functional information.                                                                                                           |

**Supplementary Table 2.** A current list of datasets accessible through MaGnET, their sources, and planned additions/changes in the near future.

| Dataset                                                                                 | Source                                                                                                                                                                                                                                                                                                                                                                                                                                                                                                                                                                                                                                                                                                                                                                                                                                 |
|-----------------------------------------------------------------------------------------|----------------------------------------------------------------------------------------------------------------------------------------------------------------------------------------------------------------------------------------------------------------------------------------------------------------------------------------------------------------------------------------------------------------------------------------------------------------------------------------------------------------------------------------------------------------------------------------------------------------------------------------------------------------------------------------------------------------------------------------------------------------------------------------------------------------------------------------|
| Chromosome, gene and protein sequences and curated gene annotation                      | Wellcome Trust Sanger Institute ( <a href="http://www.sanger.ac.uk/Projects/P_falciparum/">http://www.sanger.ac.uk/Projects/P_falciparum/</a> )<br>PlasmoDB ( <a href="http://www.plasmodb.org/plasmo/">http://www.plasmodb.org/plasmo/</a> )<br>Gardner, M.J., Hall, N., Fung, E., White, O., Berriman, M., Hyman, R.W., Carlton, J.M., Pain, A., Nelson, K.E., Bowman, S., et al. 2002. Genome sequence of the human malaria parasite <i>Plasmodium falciparum</i> . <i>Nature</i> 419: 498-511.                                                                                                                                                                                                                                                                                                                                     |
| Gene Ontology annotation                                                                | PlasmoDB ( <a href="http://www.plasmodb.org/plasmo/">http://www.plasmodb.org/plasmo/</a> )<br>Ashburner, M., Ball, C.A., Blake, J.A., Botstein, D., Butler, H., Cherry, J.M., Davis, A.P., Dolinski, K., Dwight, S.S., Eppig, J.T., et al. 2000. Gene ontology: tool for the unification of biology. The Gene Ontology Consortium. <i>Nat Genet</i> 25: 25-29.                                                                                                                                                                                                                                                                                                                                                                                                                                                                         |
| InterPro sequence features                                                              | PlasmoDB ( <a href="http://www.plasmodb.org/plasmo/">http://www.plasmodb.org/plasmo/</a> )<br>Hunter, S., Apweiler, R., Attwood, T.K., Bairoch, A., Bateman, A., Binns, D., Bork, P., Das, U., Daugherty, L., Duquenne, L., et al. 2009. InterPro: the integrative protein signature database. <i>Nucleic Acids Res</i> 37: D211-215.                                                                                                                                                                                                                                                                                                                                                                                                                                                                                                  |
| Ortholog and paralog groupings                                                          | PlasmoDB ( <a href="http://www.plasmodb.org/plasmo/">http://www.plasmodb.org/plasmo/</a> )<br>Li, L., Stoeckert, C.J., Jr., and Roos, D.S. 2003. OrthoMCL: identification of ortholog groups for eukaryotic genomes. <i>Genome Res</i> 13: 2178-2189.                                                                                                                                                                                                                                                                                                                                                                                                                                                                                                                                                                                  |
| Protein-protein interactions                                                            | LaCount, D.J., Vignali, M., Chettier, R., Phansalkar, A., Bell, R., Hesselberth, J.R., Schoenfeld, L.W., Ota, I., Sahasrabudhe, S., Kurschner, C., et al. 2005. A protein interaction network of the malaria parasite <i>Plasmodium falciparum</i> . <i>Nature</i> 438: 103-107.                                                                                                                                                                                                                                                                                                                                                                                                                                                                                                                                                       |
| Experimentally-solved 3D protein structures                                             | RCSB Protein Data Bank ( <a href="http://www.rcsb.org/pdb">http://www.rcsb.org/pdb</a> )<br>Berman, H.M., Westbrook, J., Feng, Z., Gilliland, G., Bhat, T.N., Weissig, H., Shindyalov, I.N., and Bourne, P.E. 2000. The Protein Data Bank. <i>Nucleic Acids Res</i> 28: 235-242.                                                                                                                                                                                                                                                                                                                                                                                                                                                                                                                                                       |
| Comparatively-modelled 3D protein structures (see below for quality-filtering criteria) | ModBase ( <a href="http://modbase.compbio.ucsf.edu/">http://modbase.compbio.ucsf.edu/</a> )*<br>Pieper, U., Eswar, N., Webb, B.M., Eramian, D., Kelly, L., Barkan, D.T., Carter, H., Mankoo, P., Karchin, R., Marti-Renom, M.A., et al. 2009. MODBASE, a database of annotated comparative protein structure models and associated resources. <i>Nucleic Acids Res</i> 37: D347-354.<br>*A comprehensive updated comparative model set for MaGnET will be added in the autumn of 2013 through collaboration with the Protein Model Portal ( <a href="http://www.proteinmodelportal.org">http://www.proteinmodelportal.org</a> ).                                                                                                                                                                                                       |
| mRNA time series expression data for several life cycle stages                          | Llinas, M., Bozdech, Z., Wong, E.D., Adai, A.T., and DeRisi, J.L. 2006. Comparative whole genome transcriptome analysis of three <i>Plasmodium falciparum</i> strains. <i>Nucleic Acids Res</i> 34: 1166-1173.<br>Young, J.A., Fivelman, Q.L., Blair, P.L., de la Vega, P., Le Roch, K.G., Zhou, Y., Carucci, D.J., Baker, D.A., and Winzeler, E.A. 2005. The <i>Plasmodium falciparum</i> sexual development transcriptome: a microarray analysis using ontology-based pattern identification. <i>Mol Biochem Parasitol</i> 143: 67-79.<br>Le Roch, K.G., Zhou, Y., Blair, P.L., Grainger, M., Moch, J.K., Haynes, J.D., De La Vega, P., Holder, A.A., Batalov, S., Carucci, D.J., et al. 2003. Discovery of gene function by expression profiling of the malaria parasite life cycle. <i>Science</i> 301: 1503-1508.                 |
| RNA-Seq transcriptome data                                                              | Otto, T.D., Wilinski, D., Assefa, S., Keane, T.M., Sarry, L.R., Böhme, U., Lemieux, J., Barrell, B., Pain, A., Berriman, M., et al. 2010. New insights into the blood-stage transcriptome of <i>Plasmodium falciparum</i> using RNA-Seq. <i>Mol Microbiol</i> 76: 12-24.<br>Bártfai, R., Hoeijmakers, W.A., Salcedo-Amaya, A.M., Smits, A.H., Janssen-Megens, E., Kaan, A., Treeck, M., Gilberger, T.W., François, K.J., Stunnenberg, H.G. 2010. H2A.Z demarcates intergenic regions of the <i>Plasmodium falciparum</i> epigenome that are dynamically marked by H3K9ac and H3K4me3. <i>PLoS Pathog</i> 6: e1001223.                                                                                                                                                                                                                  |
| Protein time series expression data for several life cycle stages                       | Le Roch, K.G., Johnson, J.R., Florens, L., Zhou, Y., Santrosyan, A., Grainger, M., Yan, S.F., Williamson, K.C., Holder, A.A., Carucci, D.J., et al. 2004. Global analysis of transcript and protein levels across the <i>Plasmodium falciparum</i> life cycle. <i>Genome Res</i> 14: 2308-2318.<br>Florens, L., Washburn, M.P., Raine, J.D., Anthony, R.M., Grainger, M., Haynes, J.D., Moch, J.K., Muster, N., Sacci, J.B., Tabb, D.L., et al. 2002. A proteomic view of the <i>Plasmodium falciparum</i> life cycle. <i>Nature</i> 419: 520-526.<br>Lasonder, E., Ishihama, Y., Andersen, J.S., Vermunt, A.M., Pain, A., Sauerwein, R.W., Eling, W.M., Hall, N., Waters, A.P., Stunnenberg, H.G., et al. 2002. Analysis of the <i>Plasmodium falciparum</i> proteome by high-accuracy mass spectrometry. <i>Nature</i> 419: 537-542. |

**Supplementary Information: Criteria used for filtering out low quality comparative models downloaded from ModBase.**

In order to help the targeted non-expert usership of MaGnET, we try to apply conservative quality/confidence cut-offs when offering predicted information, and make a distinction in the visual display style between experimental and predicted information (e.g. by colour, or separation into known/predicted sections). For example, we currently supplement the few known protein structures for *P. falciparum* with comparative 3-D models that we extract from the comprehensive sets available through ModBase (Pieper, et al., 2006). ModBase delivers a set ranging from high to low confidence models for each modellable gene, so that experts can select based on their criteria of choice. To avoid confusing non-experts with models that stand very little chance to be accurate, MaGnET only displays a sub-selection of medium-to-high confident ModBase models, pre-filtering based on ModBase quality indices:

| Parameter                              | Condition                            |
|----------------------------------------|--------------------------------------|
| E value of match to template sequence  | Less than or equal to $10^{-6}$      |
| Sequence identity to template sequence | Greater than or equal to 20%         |
| Model length                           | Greater than or equal to 45 residues |
| ModBase model score                    | Greater than or equal to 0.7         |

See also Suppl. Table 2, above, for a planned transition of our 3-D model source to the multi-method portal.

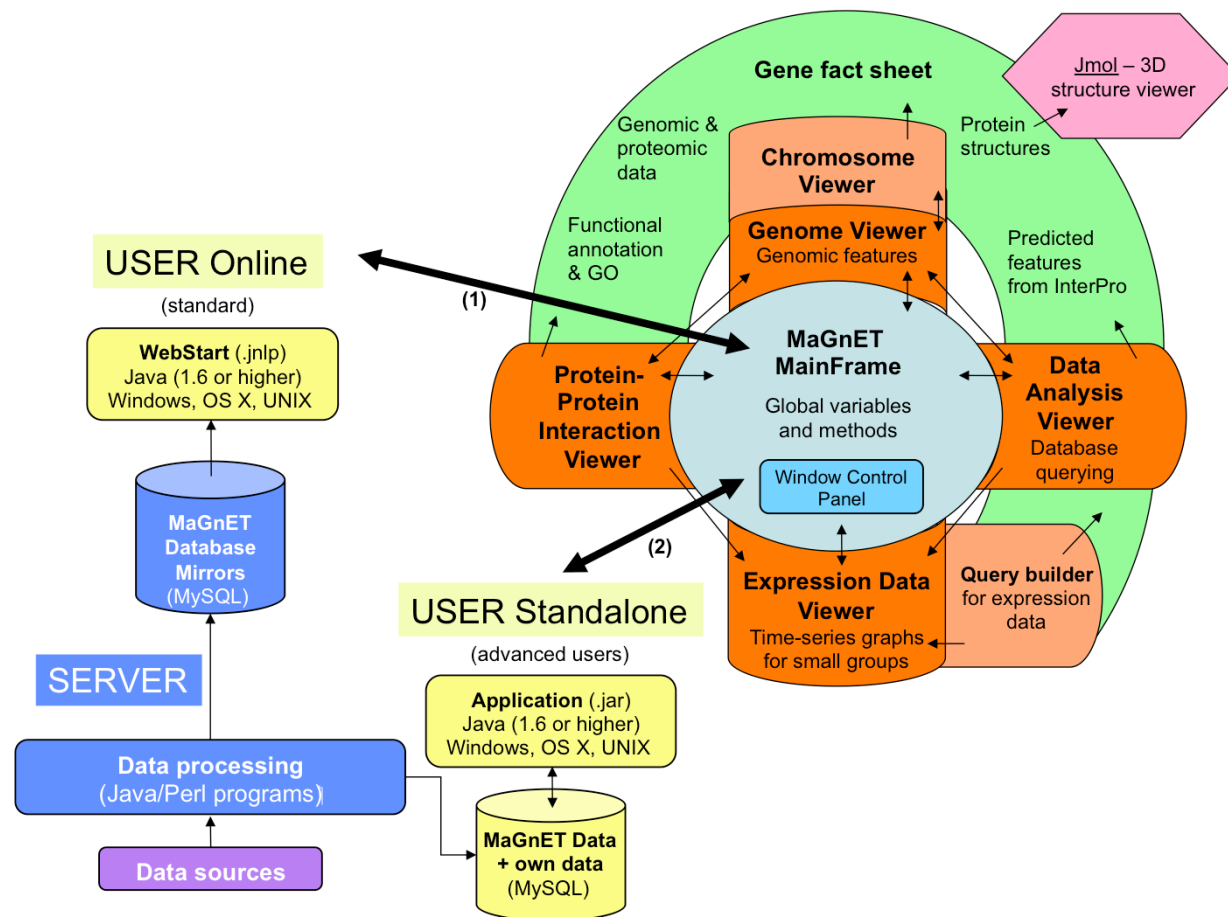

**Supplementary Fig. 1.** MaGnET organisational diagram. MaGnET consists of four main viewers: a Genome Viewer for visualising genomic features; a Protein-Protein Interaction Viewer for visualising protein interaction networks; an Expression Data Viewer for exploring time-series data and viewing expression profiles; and a Data Analysis Viewer for querying the database. The Window Control Panel enables one-click navigation between windows. At any point fact sheets listing textual information about individual genes are available. The Jmol viewer is included as an add-on program for visualising 3-D protein structures. MaGnET is available to use "online" via a Java Web Start application that accesses data at our data servers (which are updated synchronously with new releases of its data sources), or "standalone" with the Java program connecting to a local database user-side.
